# Supplementary material for: A novel method of transcriptome interpretation reveals a quantitative suppressive effect on tomato immune signaling by two domains in a single pathogen effector protein
Source: PubMed Central journal article supplement (PMC4790048; doi:10.1186/s12864-016-2534-4), 2016-03-14
Supplement: 12864_2016_2534_MOESM8_ESM.pdf [file 12864_2016_2534_MOESM8_ESM.pdf]

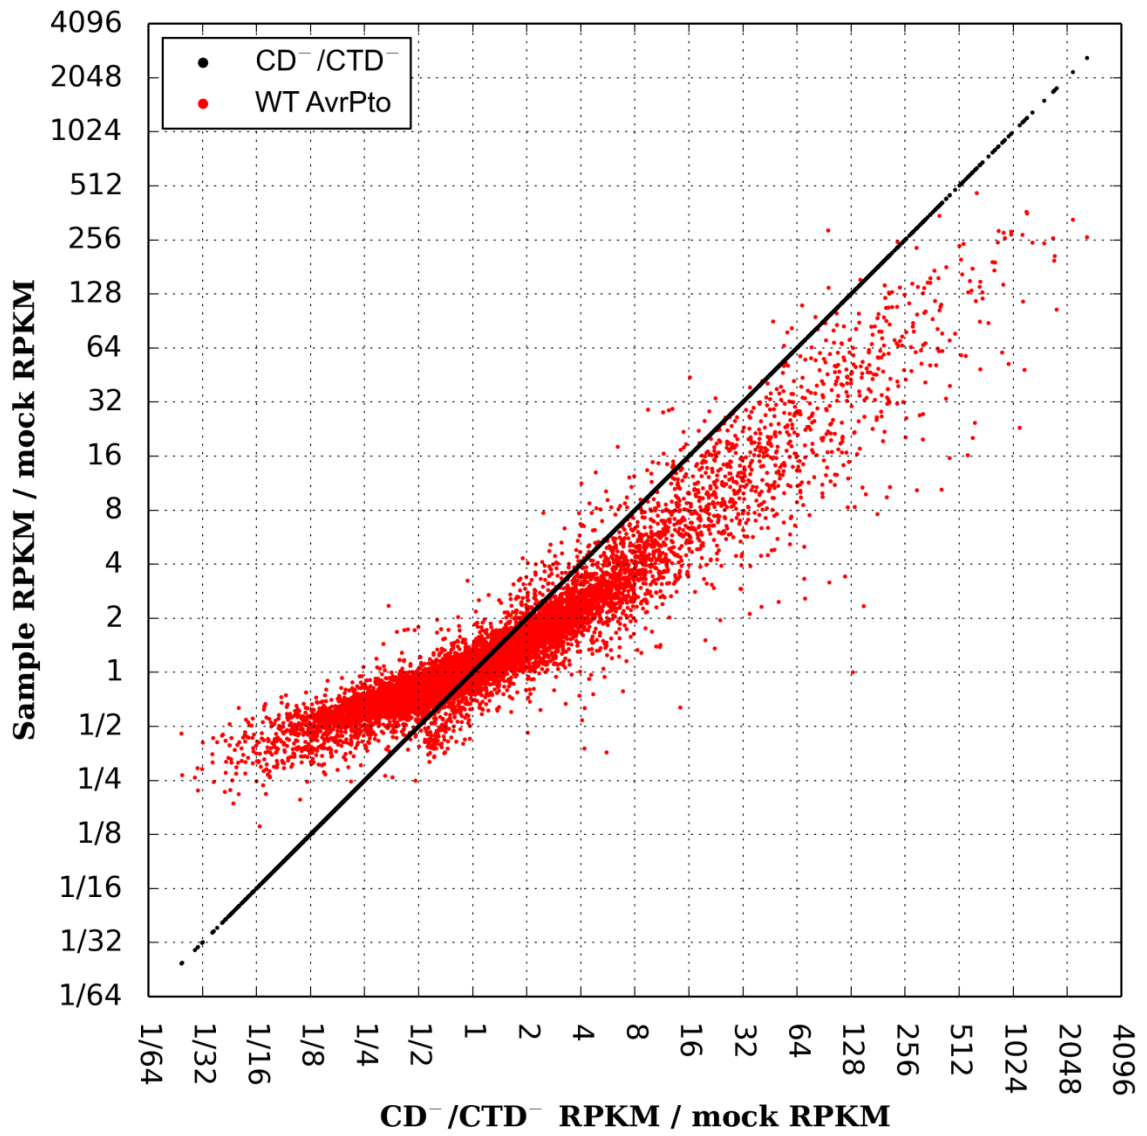

Figure S4
